# Supplementary material for: Heart failure in pregnant women with cardiac disease: data from the ROPAC
Source: HighWire-hosted journal article supplement (doi:10.1136/heartjnl-2013-304888), 2013-11-29
Supplement: heartjnl-2013-304888supp.pdf [file heartjnl-2013-304888supp.pdf]

ROPAC investigators:

| <b>Site</b>                       | <b>Investigators</b>                                                                                       |
|-----------------------------------|------------------------------------------------------------------------------------------------------------|
| Innsbruck, Austria                | E. Donhauser , J. Stein                                                                                    |
| Leuven, Belgium                   | W. Budts                                                                                                   |
| Gent, Belgium                     | J. De Backer                                                                                               |
| Brussels, Belgium                 | M. Morissens                                                                                               |
| Hamilton, Ontario,<br>Canada      | E. Gordon , L. Walter                                                                                      |
| Montreal, Canada                  | A. Marelli , A. R. Montesclaros                                                                            |
| Prague, Czech republic            | J. Popelova                                                                                                |
| Hradec Kralove, Czech<br>Republic | Z. Vavera                                                                                                  |
| Minia, Egypt                      | N. Taha                                                                                                    |
| Benha (Kaliubeya),<br>Egypt       | A. El Nagar, H.H. Ebaid , W. A. El Sayed Makled                                                            |
| Cairo, Egypt                      | K. Sorour , M. A. Meguid Mahdy, Z. Ashour                                                                  |
| Alexandria, Egypt                 | Y. Elrakshy                                                                                                |
| Paris, France                     | B. lung                                                                                                    |
| Paris, France                     | L. Iserin , M. Ladouceur                                                                                   |
| Tbilisi, Georgia                  | D. Maisuradze                                                                                              |
| München, Germany                  | H. Kaemmerer , S. Mebus, K.T.M. Schneider B. Kuschel                                                       |
| Muenster, Germany                 | A. Hellige , A. Kempny , R. Schmidt                                                                        |
| Essen, Germany                    | C. Wald                                                                                                    |
| Oldenburg, Germany                | R. Motz                                                                                                    |
| Berlin, Germany                   | F. Berger , N. Nagdyman                                                                                    |
| Athens, Greece                    | A. Frogoudaki                                                                                              |
| Rehovot, Israel                   | S. Goland                                                                                                  |
| Beer Yakov, Israel                | A. Blatt                                                                                                   |
| Torino, Italy                     | A. Maina , C. Bossotti , E. Gollo , E. Vasario , G. Boccuzzi , T. Todros<br>, V. Donvito , W. Grosso Marra |
| Bolzano, Italy                    | C. Romeo , R. Crepaz                                                                                       |
| Milano, Italy                     | V. Fesslova                                                                                                |
| Massa, Italy                      | P. Festa                                                                                                   |
| Palermo, Italy                    | M. G. Carmina                                                                                              |
| Chiba, Japan                      | K. Niwa, T. Ikeda, Y. Matsuda                                                                              |
| Vilnius, Lithuania                | L. Gumbiene                                                                                                |
| Msida, Malta                      | A. Cassar , M. Caruana                                                                                     |
| Rotterdam, The<br>Netherlands     | J. Roos-Hesselink , Y. Karamermer, A. Can, J. Duvekot, J. Cornette                                         |
| Groningen, The<br>Netherlands     | E. Pieper                                                                                                  |
| Utrecht, the<br>Netherlands       | C. van Oppen                                                                                               |
| The Hague, The<br>Netherlands     | C. De Groot                                                                                                |

|                                      |                                                                        |
|--------------------------------------|------------------------------------------------------------------------|
| Geldrop, The Netherlands             | P. Polak                                                               |
| Oslo, Norway                         | M. Estensen                                                            |
| Krakow, Poland                       | A. Lesniak-Sobelga , M. Olszowska , P. Podolec , S. Wisniowska-Smialek |
| Lisboa, Portugal                     | L. de Sousa                                                            |
| Coimbra, Portugal                    | N. Guerra                                                              |
| Bucharest, Romania                   | V. Petrescu                                                            |
| Izhevsk, Russian federation          | I. Ravilevich Gaisin, L.V. Shilina                                     |
| Moscow, Russian Federation           | N. Sharashkina , O. Tkacheva                                           |
| Belgrade, Serbia                     | L. Jovovic                                                             |
| Ljubljana, Slovenia                  | M. Kozelj                                                              |
| Barcelona, Spain                     | A. Pijuan Domenech                                                     |
| Barcelona, Spain                     | M. T. Subirana                                                         |
| Madrid, Spain                        | J. M. Oliver                                                           |
| Bilbao, Spain                        | N. Murga                                                               |
| Lund, Sweden                         | U. Thilen                                                              |
| Bern, Switzerland                    | M. Schwerzmann                                                         |
| Abu Dhabi, United Arab Emirates      | W. Almahmeed                                                           |
| Dubai, United Arab Emirates          | A. Yusufali , E. Alhatou , F. Hussain                                  |
| London, United Kingdom               | P. Nihoyannopoulos                                                     |
| Norwich, Norfolk, United Kingdom     | L. Freeman , R. Hall                                                   |
| Southampton, United Kingdom          | G. Veldtman , J. Kerr , L. Tellett                                     |
| Hershey, United States               | J. Botti , J. Ting , W. R. Davidson                                    |
| Seattle, United states               | M. Gurvitz , C. Otto                                                   |
| Palo Alto, California, United States | C. Talluto , D. Murphy , M. G. Perlroth                                |
| Detroit, Michigan, United States     | K. Chintala , P. Gupta                                                 |
